# Supplementary figures and images for: Direct observation of light induced spin transitions in new 3,5-bis(2-pyridyl)pyrazolato bridged thiocyanato diiron(ii) complexes by monitoring variable temperature laser Raman spectra
Source: Royal Society of Chemistry journal article supplement (doi:10.1039/b104121p), 2001-01-01

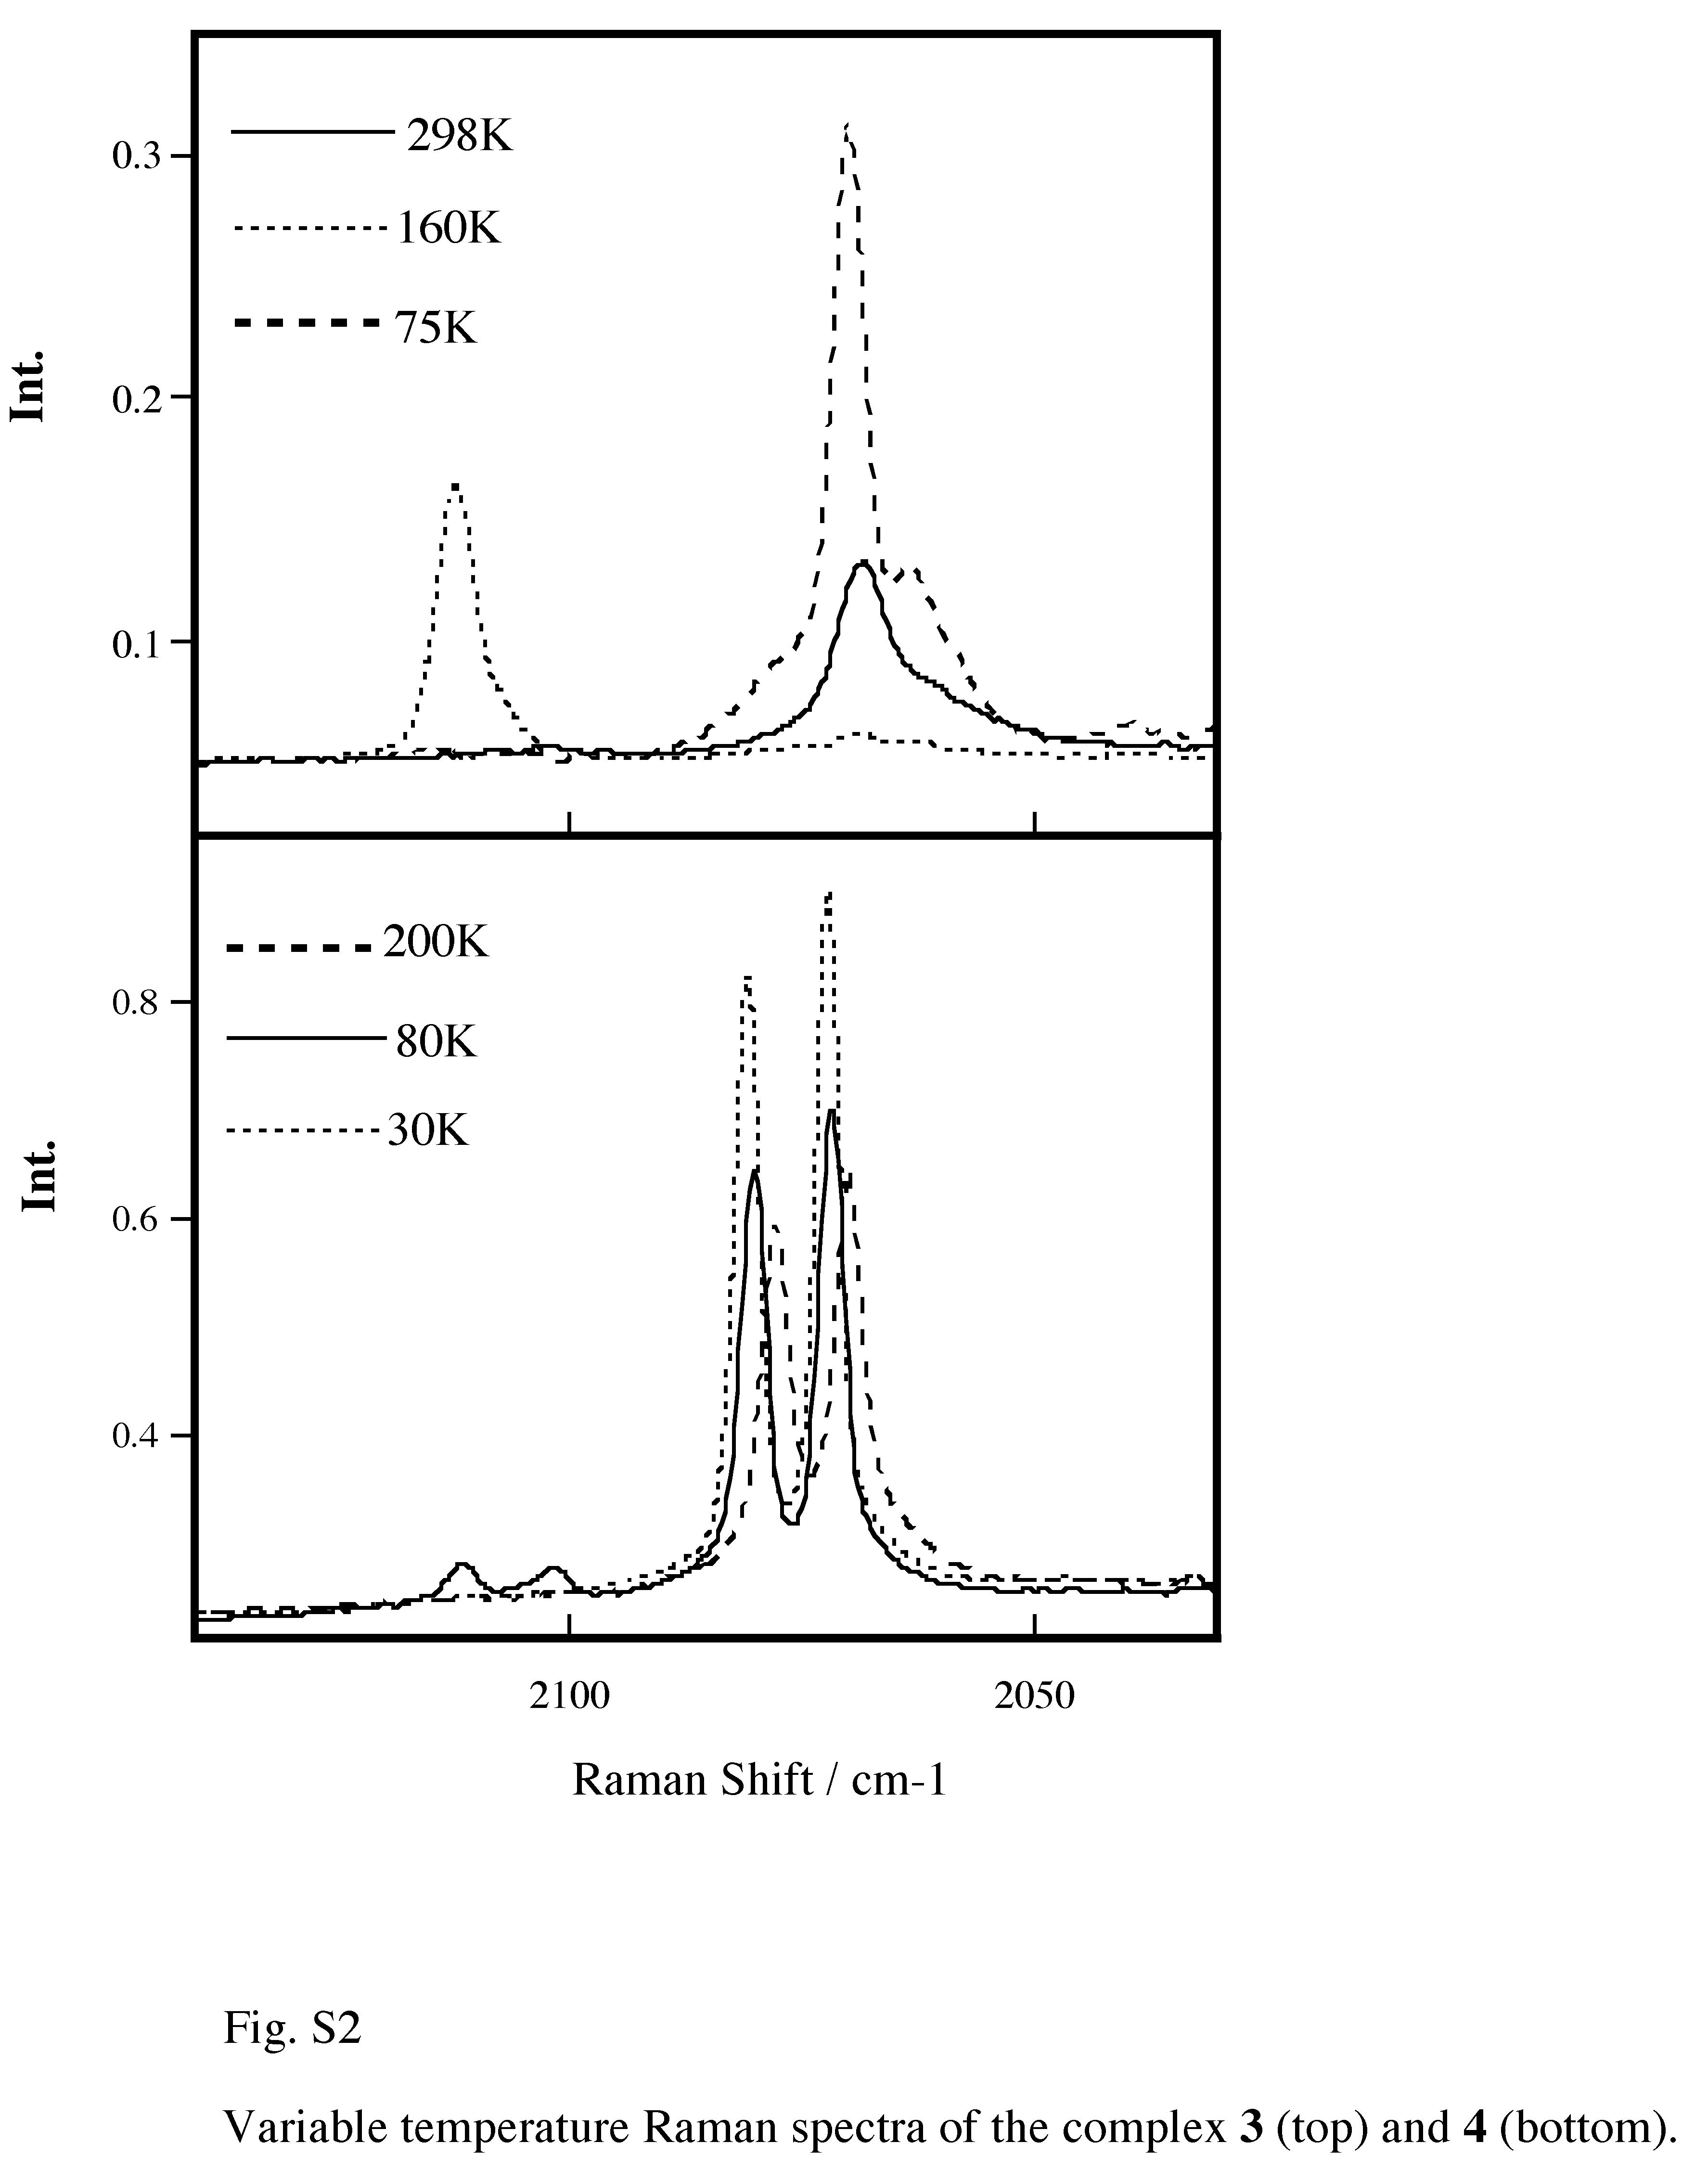

Supplement: b104121p2.doc [file b104121p2.doc]
